# Supplementary material for: Design of a Seed-Specific Chimeric Promoter with a Modified Expression Profile to Improve Seed Oil Content
Source: MDPI journal article supplement (doi:10.3390/ijms19061667), 2018-06-05
Supplement: s1 [file s1]

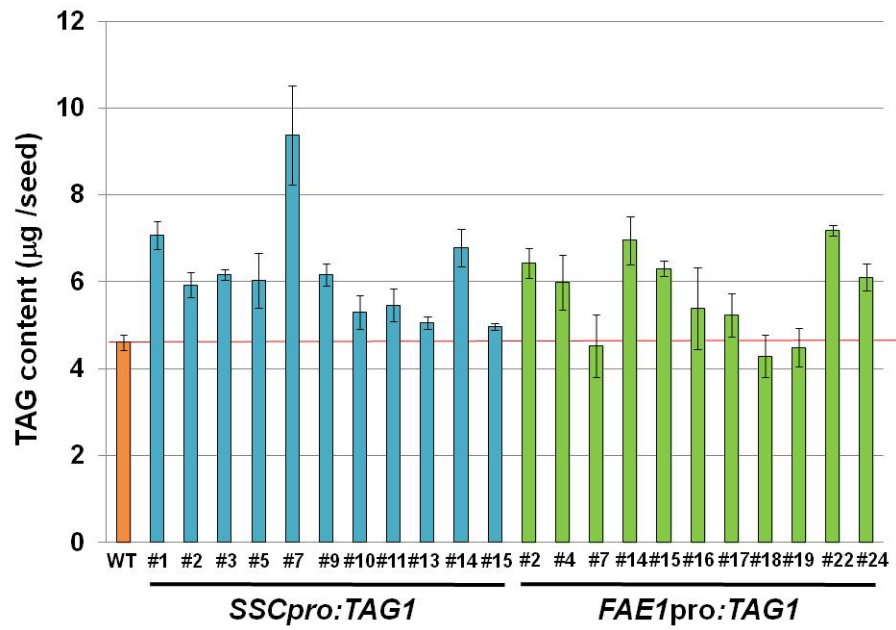

**Figure S1.** Triacylglycerol (TAG) content per seed. TAG content in seeds from independent transgenic lines expressing *TAG1* under control of the *SSC* promoter or *FAE1* promoter. TAG content is expressed as weight ( $\mu\text{g}$ ) per seed. Values are means  $\pm$  standard deviation of measurements of 5 independent experiments.
